# Supplementary material for: Panmictic and Clonal Evolution on a Single Patchy Resource Produces Polymorphic Foraging Guilds
Source: PubMed Central journal article supplement (PMC4537111; doi:10.1371/journal.pone.0133732), 2015-08-14
Supplement: pone.0133732.s001.pdf [file pone.0133732.s001.pdf]

## S1 Table. Model Notation

### Time

$T$ : current generation time  
 $G$ : maximum generation time  
 $t$ : intra-generation time  
 $n$ : maximum intra-generation time

### Agent associated designators

$A_a$ : agent  $a$   
 $N_A$ : number of agents  
 $E_a(t)$ : local environment of agent  $a$  at time  $t$   
 $B_a(t)$ : biomass of agent  $a$  at time  $t$   
 $L_a(t)$ : location of agent  $a$  at time  $t$

### Agent movement

$M(P_a)^a$  specifies if and where to agent  $a$  will move at time  $t$ , as determined by a vector of parameters  $P_a$   
 $\alpha$ : competition-tradeoff parameter (parameter  $a$  in Nova code)  
 $\delta$ : neighbor-discount parameter (parameter  $b$  in Nova code)  
 $\rho$ : movement-threshold parameter (parameter  $w$  in Nova code)

### Agent consumption

$u$ : maximum resource extraction rate  
 $h$ : the extraction efficiency parameter  
 $q$ : the competition parameter  
 $\kappa$ : biomass conversion rate parameter  
 $c$ : metabolic loss rate parameter  
 $r$ : resource intrinsic growth rate  
 $g$ : reservoir parameter  
 $s$ : saturation parameter

### Cells

$C_{ij}$ : cell at row  $i$  and column  $j$  in the array  
 $C_k$ : cell  $k$ , where  $k = 1, \dots, n_i n_j$  is a 1-D renaming of the matrix 2-D array  
 $R_k(t)$ : resource value of cell  $k$  at time  $t$   
 $N_k(t)$ : number of agents remaining in cell  $k$  after movement at time  $t$   
 $J_k^M$ : average number of agents per cell in the Moore neighborhood of cell  $k$   
 $F_k(t)$ : resource extraction by an agent in cell  $k$  at time  $t$
