# Supplementary material for: Panmictic and Clonal Evolution on a Single Patchy Resource Produces Polymorphic Foraging Guilds
Source: PubMed Central journal article supplement (PMC4537111; doi:10.1371/journal.pone.0133732), 2015-08-14
Supplement: pone.0133732.s005.pdf [file pone.0133732.s005.pdf]

#### **S4 Text. Location of data and running the model**

A Nova Online version of the model can be found at <http://nova01.oberlin.edu/genetic>. The username is: PLOSONE; the password is: PLOSONE. Also, data plotted in Figure 8 are located at: <http://dx.doi.org/10.6084/m9.figshare.1477998>
